# Supplementary material for: Li2Ni0.2Co1.8O4 having a spinel framework as a zero-strain positive electrode material for lithium-ion batteries
Source: Royal Society of Chemistry journal article supplement (doi:10.1039/c9ta03191j), 2019-01-01
Supplement: c9ta03191j1.pdf [file c9ta03191j1.pdf]

Supporting Information for

**$\text{Li}_2\text{Ni}_{0.2}\text{Co}_{1.8}\text{O}_4$  having a Spinel Framework as Zero-Strain Positive Electrode Material for Lithium-Ion Batteries**

Kingo Ariyoshi,<sup>a,\*</sup> Yuki Orikasa,<sup>b,\*</sup> Kensuke Kajikawa,<sup>a</sup> and Yusuke Yamada<sup>a</sup>

<sup>a</sup> Department of Applied Chemistry and Bioengineering, Graduate School of Engineering, Osaka City University, 3-3-138 Sugimoto, Sumiyoshi-ku, Osaka 558-8585, Japan

<sup>b</sup> Department of Applied Chemistry, College of Life Sciences, Ritsumeikan University, 1-1-1 Noji-higashi, Kusatsu, Shiga 525-8577, Japan

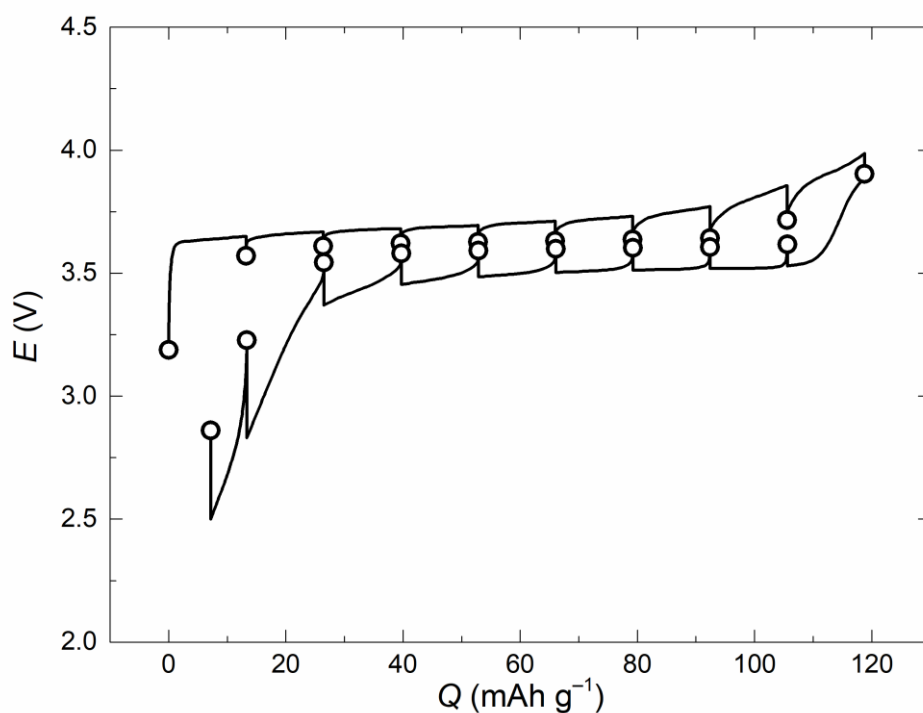

Fig. S1 Intermittent charge and discharge curves of a  $\text{Li}/\text{Li}_2\text{Ni}_{0.2}\text{Co}_{1.8}\text{O}_4$  cell at a rate of  $0.25 \text{ mA cm}^{-2}$  at  $25^\circ\text{C}$  to measure open-circuit voltages. Open circles indicate open-circuit voltages measured after the cell was open-circuited for 3 h.

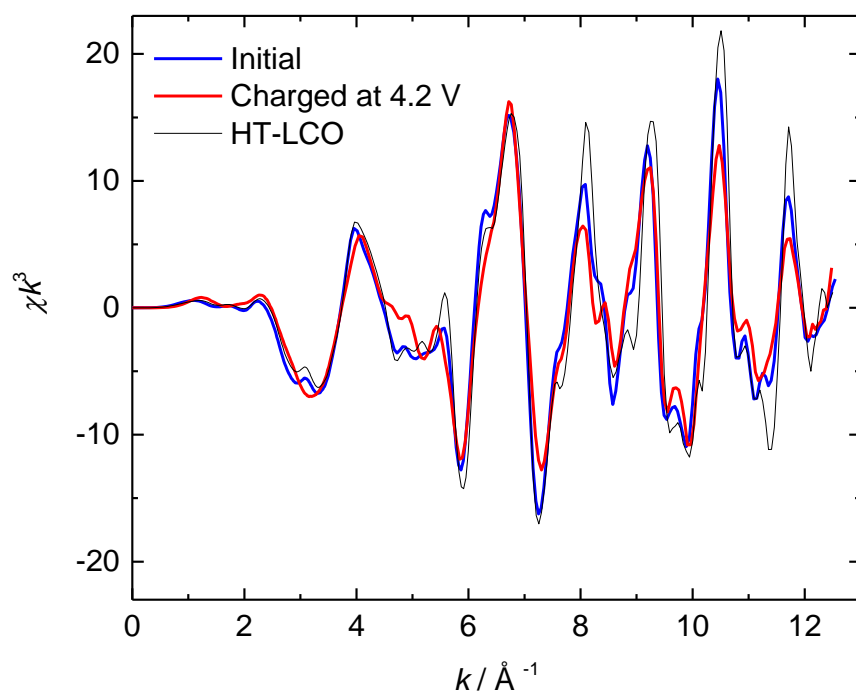

Fig. S2 Co K-edge EXAFS oscillations of  $\text{Li}_2\text{Ni}_{0.2}\text{Co}_{1.8}\text{O}_4$  at the initial and charged states and  $\text{LiCoO}_2$  (LCO).

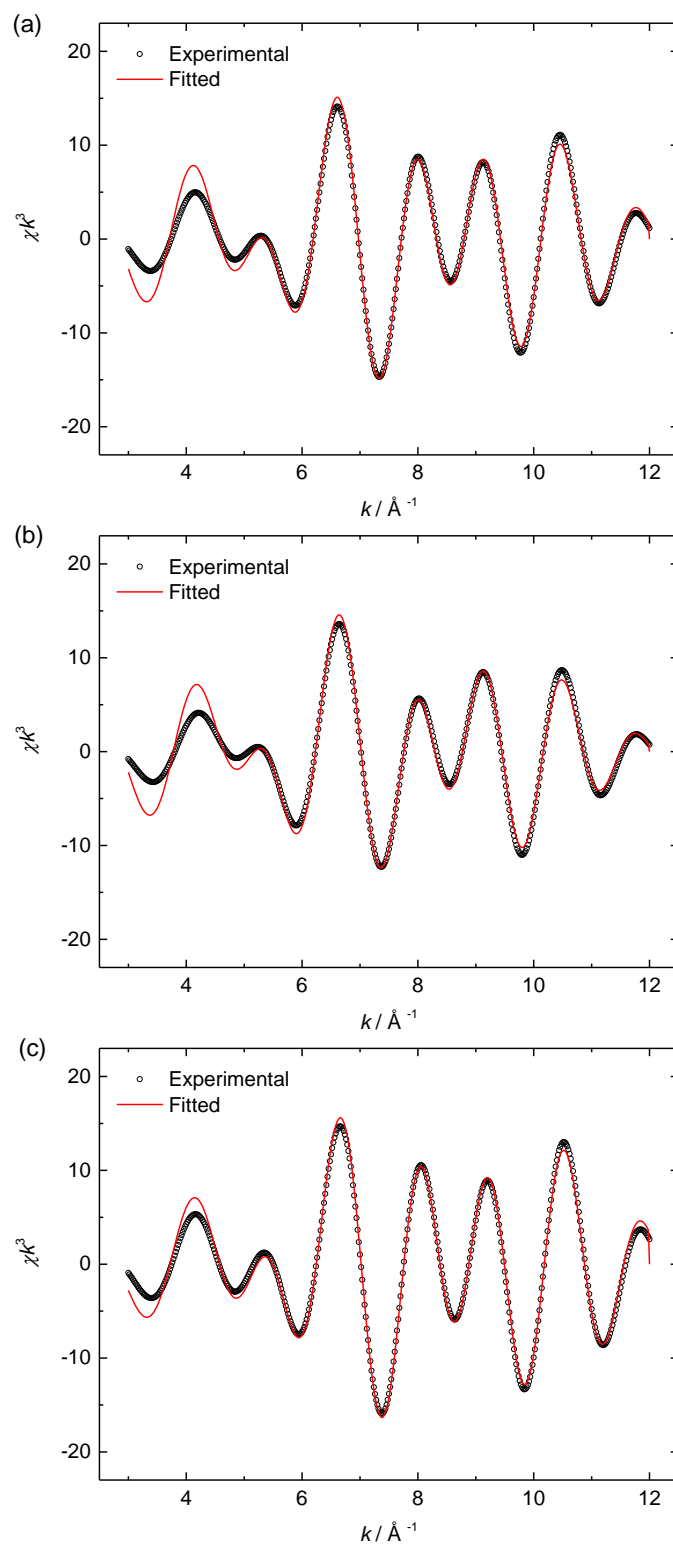

Fig. S3 Curve fitting in  $k$ -space of the Co K-edge EXAFS spectra of  $\text{Li}_2\text{Ni}_{0.2}\text{Co}_{1.8}\text{O}_4$  at the (a) initial and (b) charged states and (c)  $\text{LiCoO}_2$ .

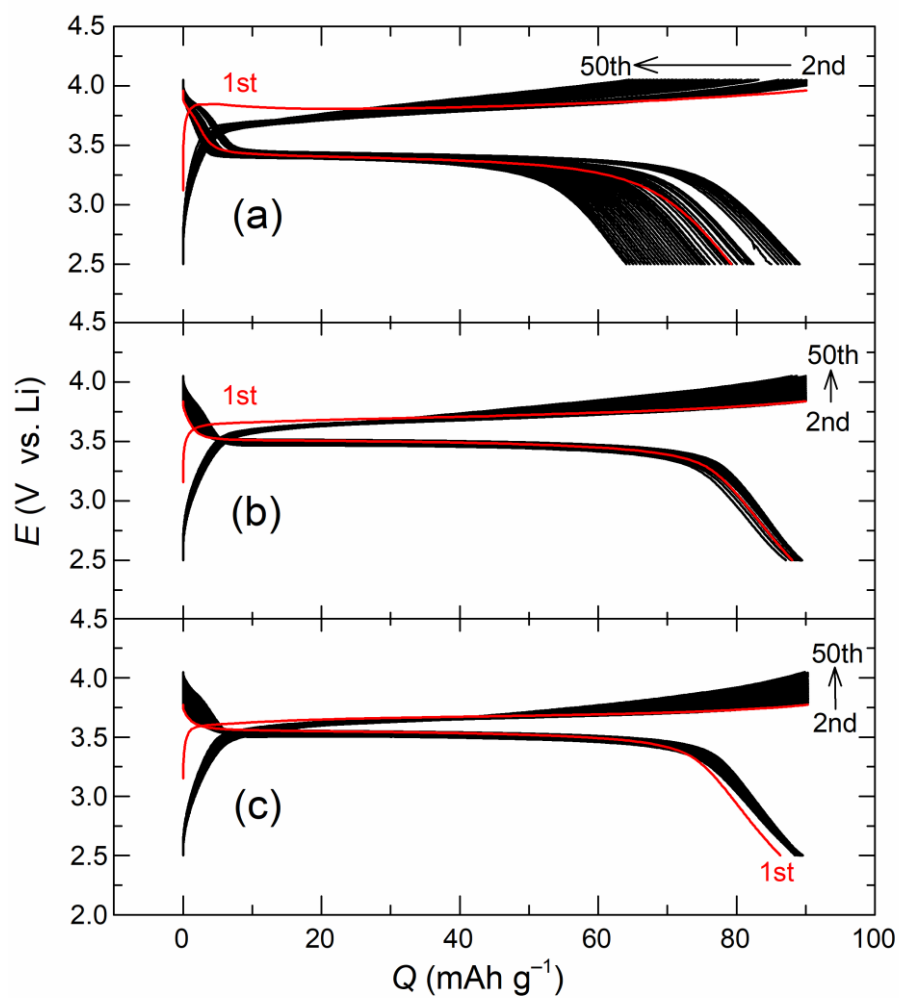

Fig. S4 Charge-discharge curves of  $\text{Li}/\text{Li}_2\text{Ni}_{0.2}\text{Co}_{1.8}\text{O}_4$  cells for 50 cycles at a rate of (a) 1.29  $\text{mA cm}^{-2}$  (1 C-rate), (b) 0.45  $\text{mA cm}^{-2}$  (1/3 C-rate), or (c) 0.14  $\text{mA cm}^{-2}$  (1/9 C-rate).

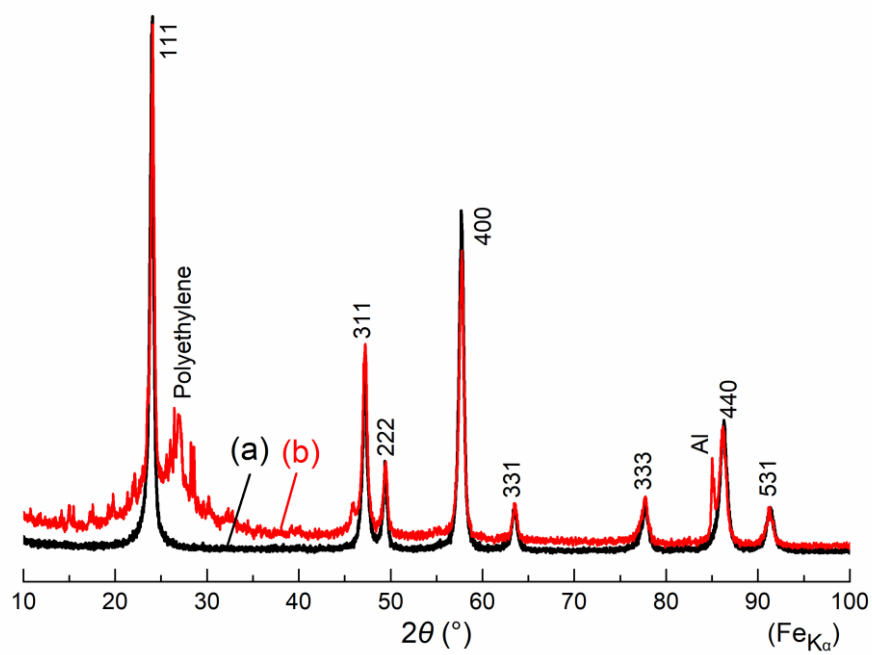

Fig. S5. XRD patterns of the  $\text{Li}_2\text{Co}_{1.8}\text{Ni}_{0.2}\text{O}_4$  (a, black) before and (b, red) after the 50-cycle test shown in Figure S4(c).

Table S1 Refined local structural parameters from the Co K-edge EXAFS of  $\text{Li}_2\text{Ni}_{0.2}\text{Co}_{1.8}\text{O}_4$  at the initial and charged states and  $\text{LiCoO}_2$  (LCO).

|                  | Co–O ( $N^a = 6$ ) |                       | Co–Co ( $N^a = 6$ ) |                       | $R_f$ (%) |
|------------------|--------------------|-----------------------|---------------------|-----------------------|-----------|
|                  | $R^b/\text{\AA}$   | $\sigma^c/\text{\AA}$ | $R^b/\text{\AA}$    | $\sigma^c/\text{\AA}$ |           |
| Initial          | 1.913(6)           | 0.078(10)             | 2.834(3)            | 0.074(5)              | 3.095     |
| Charged at 4.2 V | 1.895(5)           | 0.080(9)              | 2.838(4)            | 0.081(5)              | 4.294     |
| HT-LCO           | 1.908(6)           | 0.076(11)             | 2.813(3)            | 0.071(5)              | 1.354     |

<sup>a</sup> $N$ , coordination number of neighbors. <sup>b</sup> $R$ , interatomic bond distance. <sup>c</sup> $\sigma$ , Debye-Waller factor. <sup>d</sup> $R_f$ , fitting quality.
